# Supplementary material
Source: publisher figshare collection journal article supplement (https://acs.figshare.com/ndownloader/files/3606975)
Supplement: Supplementary file 1 [file 3606975]

**Multifunctional Sn and Fe co-doped In<sub>2</sub>O<sub>3</sub> Colloidal Nanocrystals:**

**Plasmonics and Magnetism**

Bharat Tandon, G. Shiva Shanker, Angshuman Nag<sup>\*</sup>

Department of Chemistry, Indian Institute of Science Education and Research (IISER), Pune,

India – 411008

<sup>\*</sup>Corresponding author's e-mail: [angshuman@iiserpune.ac.in](mailto:angshuman@iiserpune.ac.in)

**Supporting Information**

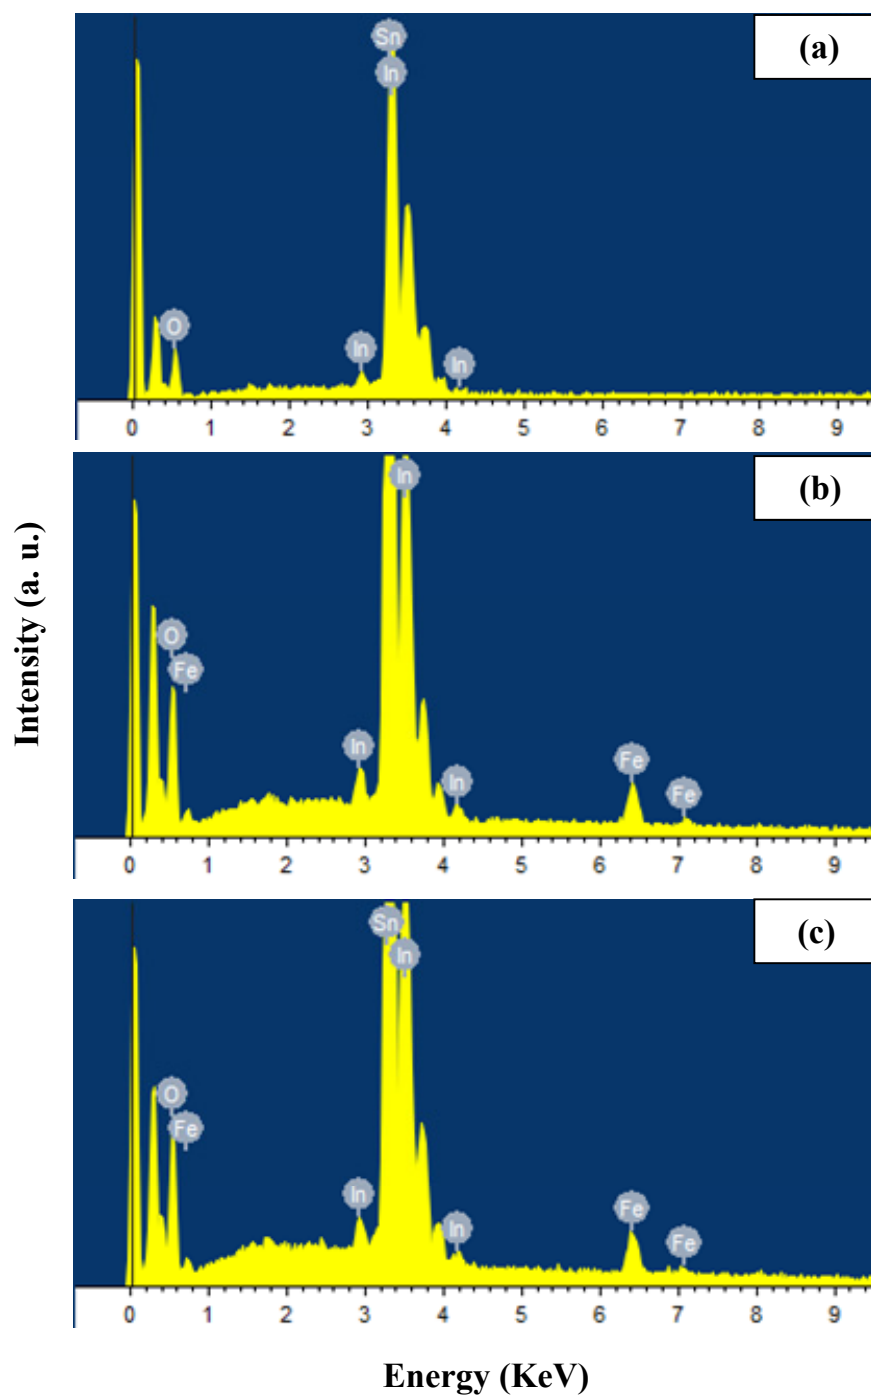

Figure S1: Energy-Dispersive X-ray Analysis (EDAX) data for (a) 10% Sn, (b) 10% Fe, and (c) 10% Sn-10% Fe doped  $\text{In}_2\text{O}_3$  nanocrystals (NCs).

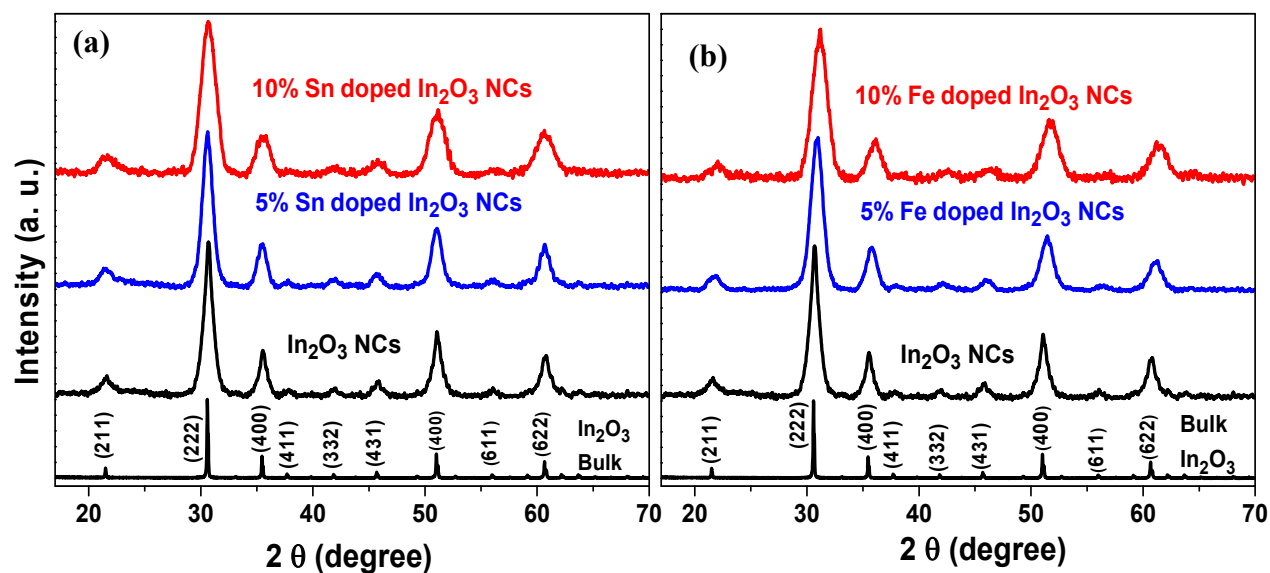

Figure S2: XRD patterns of (a) Sn doped  $\text{In}_2\text{O}_3$  NCs and (b) Fe doped  $\text{In}_2\text{O}_3$  NCs with different dopant concentrations. XRD patterns are shifted vertically for clear representation. JCPDS (88-2160) data for bulk  $\text{In}_2\text{O}_3$  with cubic bixbyite phase is shown as reference.

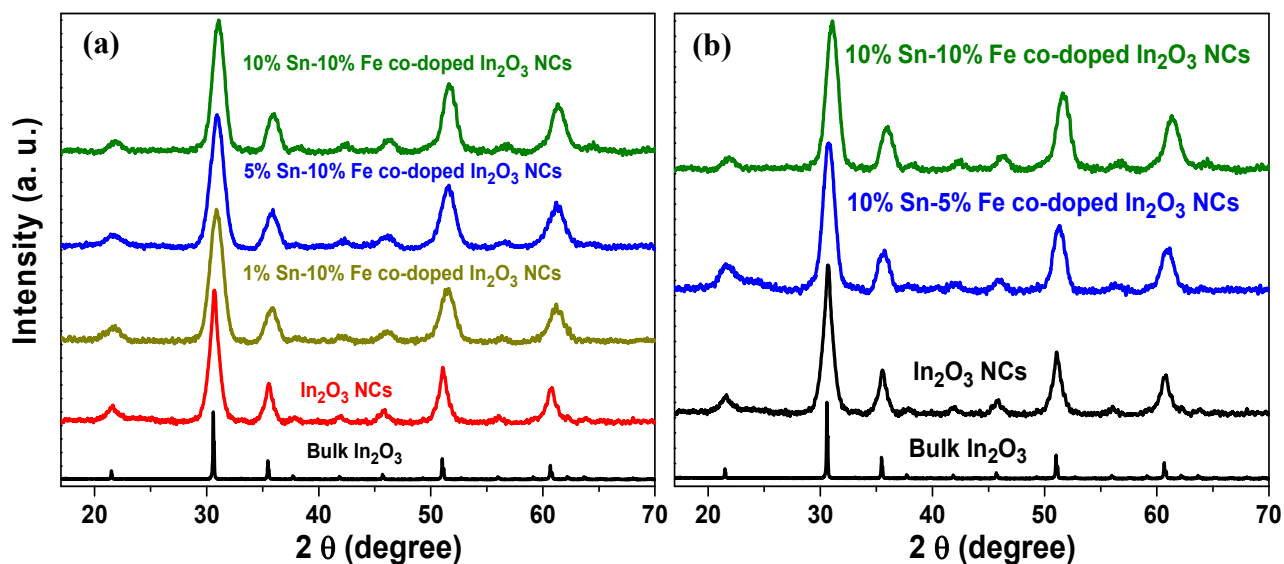

Figure S3: (a) XRD patterns of 10% Fe-Sn co-doped  $\text{In}_2\text{O}_3$  NCs with varying concentrations of Sn. (b) XRD patterns of Fe-10% Sn co-doped  $\text{In}_2\text{O}_3$  NCs with varying concentrations of Fe dopant. JCPDS (88-2160) data for bulk  $\text{In}_2\text{O}_3$  with cubic bixbyite phase is shown as reference.

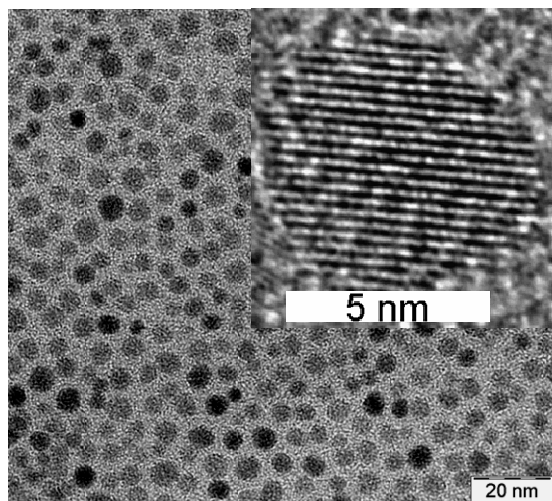

Figure S4: TEM image of 10% Fe doped  $\text{In}_2\text{O}_3$  NCs. Inset shows HRTEM image of a representative NC for the sample.

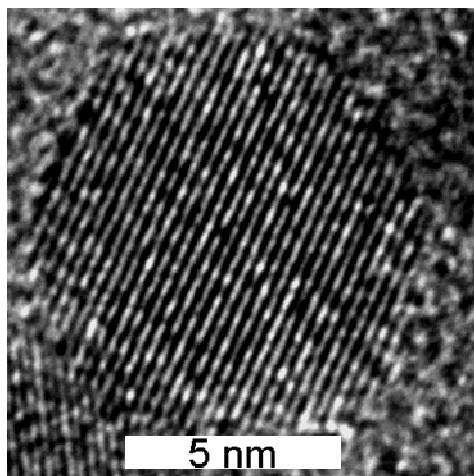

Figure S5: HRTEM image of a representative  $\text{In}_2\text{O}_3$  NC.

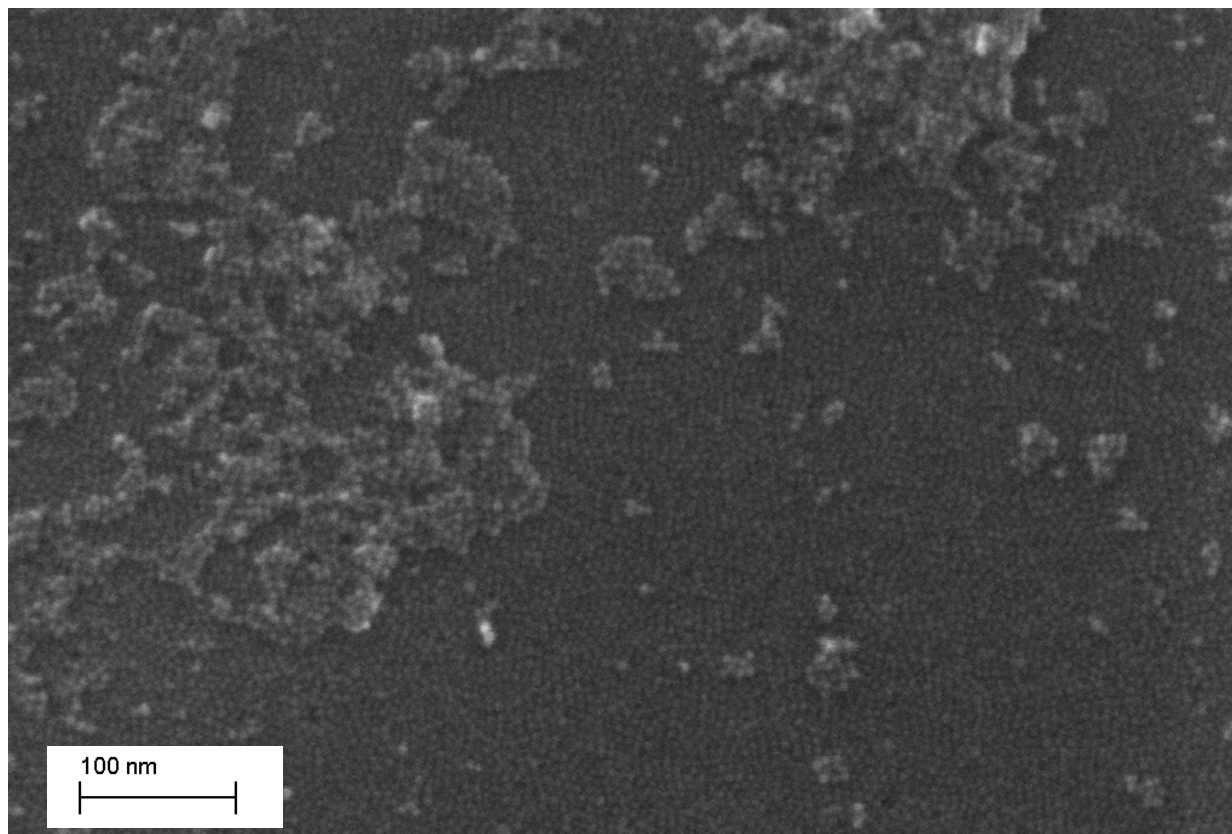

Figure S6: SEM image of 10% Fe – 10% Sn codoped  $\text{In}_2\text{O}_3$  NCs. Inset shows HRTEM image of a representative NC for the sample.

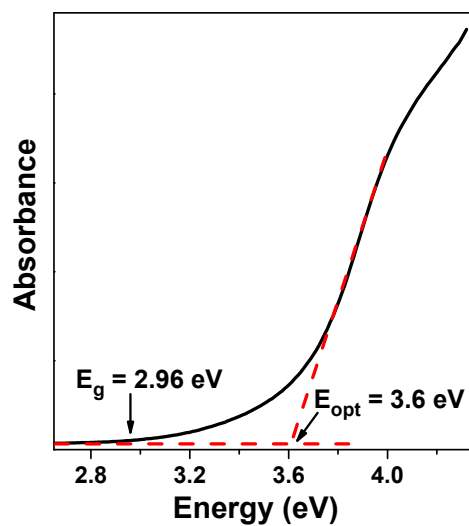

Figure S7: UV-visible absorption data of colloidal  $\text{In}_2\text{O}_3$  NCs dispersed in toluene.

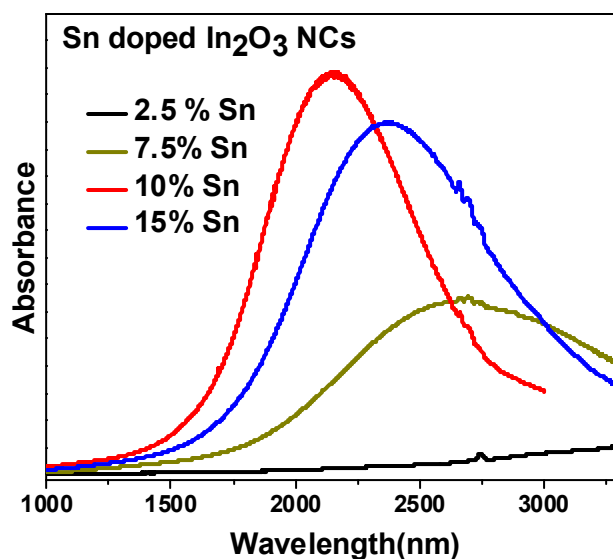

Figure S8: UV-visible-NIR absorption spectra of Sn doped  $\text{In}_2\text{O}_3$  NCs with varying Sn content. The LSPR band shifts to lower wavelengths along with an increase in absorbance as the Sn concentration increases from 2.5 to 10%, because of increase in free electron concentration with doping concentration. However, further increase in dopant concentration up to 15% shifts the LSPR band towards longer wavelengths because of the electron trapping by the dopant ions becomes prominent.

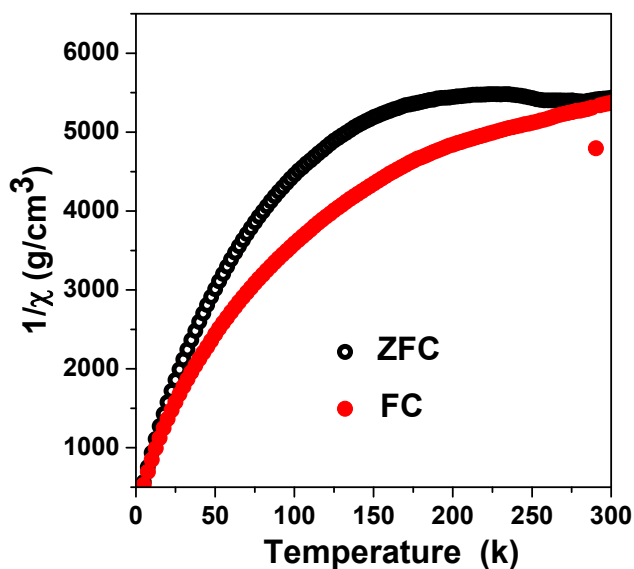

Figure S9: Curie-Weiss plot showing variation of magnetic susceptibility ( $\chi$ ) with temperature for 10% Fe – 10% Sn co-doped  $\text{In}_2\text{O}_3$  NCs.

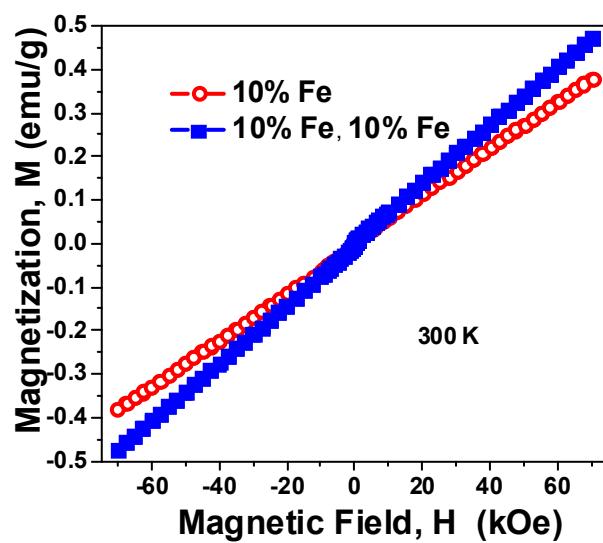

Figure S10:  $M$  vs  $H$  data for 10% Fe doped  $\text{In}_2\text{O}_3$  NCs and 10% Fe – 10% Sn co-doped  $\text{In}_2\text{O}_3$  NCs at 300 K.
